# Supplementary material
Source: PubMed Central journal article supplement (PMC3335344)
Supplement: NIHMS358633-supplement-1.pdf [file NIHMS358633-supplement-1.pdf]

**Table S1.**

| <b>Gene Name</b> | <b>Accession number</b> | <b>siRNA Ctl (run 1)</b> | <b>siRNA I6.3 (run 1)</b> | <b>siRNA Ctl (run 2)</b> | <b>siRNA I6.3 (run 2)</b> | <b>siRNA Ctl (run 3)</b> | <b>siRNA I6.3 (run 3)</b> | <b>I6.3/Ctl (run 1)</b> | <b>I6.3/Ctl (run 2)</b> | <b>I6.3/Ctl (run 3)</b> | <b>Mean Fold Change</b> | <b>Standard Deviation</b> |
|------------------|-------------------------|--------------------------|---------------------------|--------------------------|---------------------------|--------------------------|---------------------------|-------------------------|-------------------------|-------------------------|-------------------------|---------------------------|
| <i>ATM</i>       | NM_000051.3             | 27                       | 17                        | 20                       | 17                        | 53                       | 45                        | 0,64                    | 0,83                    | 0,84                    | 0,77                    | 0,11                      |
| <i>ATR</i>       | NM_001184.2             | 852                      | 748                       | 991                      | 1005                      | 1347                     | 1387                      | 0,88                    | 1,01                    | 1,03                    | 0,97                    | 0,08                      |
| <i>H2AFX</i>     | NM_002105.2             | 3740                     | 2515                      | 5467                     | 3530                      | 5630                     | 4696                      | 0,67                    | 0,65                    | 0,83                    | 0,72                    | 0,10                      |
| <i>MRE11A</i>    | NM_005591.3             | 1062                     | 672                       | 1372                     | 911                       | 1911                     | 1341                      | 0,63                    | 0,66                    | 0,70                    | 0,67                    | 0,03                      |
| <i>RAD50</i>     | NM_005732.2             | 625                      | 887                       | 914                      | 1118                      | 1205                     | 1343                      | 1,42                    | 1,22                    | 1,11                    | 1,25                    | 0,15                      |
| <i>NBN</i>       | NM_002485.4             | 1261                     | 1784                      | 1799                     | 2154                      | 1508                     | 2880                      | 1,41                    | 1,20                    | 1,91                    | 1,51                    | 0,37                      |
| <i>MDC1</i>      | NM_014641.2             | 879                      | 695                       | 1142                     | 918                       | 1576                     | 1238                      | 0,79                    | 0,80                    | 0,79                    | 0,79                    | 0,01                      |
| <i>EIF3E</i>     | NM_001568.2             | 8481                     | 727                       | 11713                    | 877                       | 14539                    | 843                       | 0,09                    | 0,07                    | 0,06                    | 0,07                    | 0,01                      |
| <i>RPS27A</i>    | NM_002954.4             | 399                      | 430                       | 514                      | 587                       | 644                      | 728                       | 1,08                    | 1,14                    | 1,13                    | 1,12                    | 0,03                      |
| <i>UBA52</i>     | NM_003333.3             | 40699                    | 42050                     | 55051                    | 54082                     | 59621                    | 69427                     | 1,03                    | 0,98                    | 1,16                    | 1,06                    | 0,09                      |
| <i>UBB</i>       | NM_018955.2             | 28482                    | 38856                     | 39710                    | 48347                     | 54671                    | 60742                     | 1,36                    | 1,22                    | 1,11                    | 1,23                    | 0,13                      |
| <i>UBC</i>       | NM_021009.4             | 78                       | 59                        | 107                      | 67                        | 95                       | 85                        | 0,75                    | 0,63                    | 0,90                    | 0,76                    | 0,13                      |
| <i>BRCA1</i>     | NM_007294.2             | 460                      | 340                       | 592                      | 472                       | 703                      | 709                       | 0,74                    | 0,80                    | 1,01                    | 0,85                    | 0,14                      |

**Table S2.**

| <b>Gene Name</b> | <b>Accession number</b> | <b>siRNA Ctl (run 1)</b> | <b>siRNA I6.3 (run 1)</b> | <b>siRNA Ctl (run 2)</b> | <b>siRNA I6.3 (run 2)</b> | <b>siRNA Ctl (run 3)</b> | <b>siRNA I6.3 (run 3)</b> | <b>I6.3/Ctl (run 1)</b> | <b>I6.3/Ctl (run 2)</b> | <b>I6.3/Ctl (run 3)</b> | <b>Mean Fold Change</b> | <b>Standard Deviation</b> |
|------------------|-------------------------|--------------------------|---------------------------|--------------------------|---------------------------|--------------------------|---------------------------|-------------------------|-------------------------|-------------------------|-------------------------|---------------------------|
| <i>ATM</i>       | NM_000051.3             | 33                       | 26                        | 29                       | 22                        | 14                       | 20                        | 0,79                    | 0,76                    | 1,46                    | 1,00                    | 0,40                      |
| <i>ATR</i>       | NM_001184.2             | 1051                     | 790                       | 1223                     | 1159                      | 934                      | 1008                      | 0,75                    | 0,95                    | 1,08                    | 0,93                    | 0,17                      |
| <i>H2AFX</i>     | NM_002105.2             | 6422                     | 3082                      | 7463                     | 4336                      | 6260                     | 4743                      | 0,48                    | 0,58                    | 0,76                    | 0,61                    | 0,14                      |
| <i>MRE11A</i>    | NM_005591.3             | 1744                     | 958                       | 1828                     | 1283                      | 1648                     | 1069                      | 0,55                    | 0,70                    | 0,65                    | 0,63                    | 0,08                      |
| <i>RAD50</i>     | NM_005732.2             | 910                      | 1395                      | 965                      | 1628                      | 750                      | 1044                      | 1,53                    | 1,69                    | 1,39                    | 1,54                    | 0,15                      |
| <i>NBN</i>       | NM_002485.4             | 2114                     | 2511                      | 2405                     | 3123                      | 1871                     | 2486                      | 1,19                    | 1,30                    | 1,33                    | 1,27                    | 0,07                      |
| <i>MDC1</i>      | NM_014641.2             | 1365                     | 737                       | 1457                     | 1237                      | 1182                     | 1015                      | 0,54                    | 0,85                    | 0,86                    | 0,75                    | 0,18                      |
| <i>EIF3E</i>     | NM_001568.2             | 13179                    | 630                       | 17183                    | 988                       | 11066                    | 515                       | 0,05                    | 0,06                    | 0,05                    | 0,05                    | 0,01                      |
| <i>RPS27A</i>    | NM_002954.4             | 903                      | 1069                      | 934                      | 1004                      | 678                      | 784                       | 1,18                    | 1,07                    | 1,16                    | 1,14                    | 0,06                      |
| <i>UBA52</i>     | NM_003333.3             | 66470                    | 88372                     | 78840                    | 81591                     | 54272                    | 60686                     | 1,33                    | 1,03                    | 1,12                    | 1,16                    | 0,15                      |
| <i>UBB</i>       | NM_018955.2             | 54915                    | 85377                     | 57004                    | 83187                     | 46003                    | 65424                     | 1,55                    | 1,46                    | 1,42                    | 1,48                    | 0,07                      |
| <i>UBC</i>       | NM_021009.4             | 127                      | 158                       | 116                      | 113                       | 113                      | 84                        | 1,25                    | 0,97                    | 0,74                    | 0,99                    | 0,25                      |
| <i>BRCA1</i>     | NM_007294.2             | 654                      | 326                       | 712                      | 642                       | 580                      | 548                       | 0,50                    | 0,90                    | 0,95                    | 0,78                    | 0,25                      |
